# Supplementary material for: An Extended Investigation of Unexpected Helicoverpa zea (Boddie) Survival and Ear Injury on a Transgenic Maize Hybrid Expressing Cry1A/Cry2A/Vip3A Toxins
Source: MDPI journal article supplement (doi:10.3390/toxins15070474), 2023-07-22
Supplement: s1 [file s1]

# Supplementary Materials: An Extended Investigation of Unexpected *Helicoverpa zea* (Boddie) Survival and Ear Injury on a Transgenic Maize Hybrid Expressing Cry1A/Cry2A/Vip3A Toxins

Fangneng Huang, Ying Niu, Tiago Silva, Sebe Brown, Tyler Towles, Dawson Kerns, Juan Luis Jurat-Fuentes, Graham P. Head, Matthew Carroll, Wade Walker and Shucong Lin

**Table S1.** Field surveys on larval occurrence of *Helicoverpa zea* and maize ear injury of a non-Bt and TRE maize traits in two sentinel plots (SNT-I and SNT-II) near Alexandria, LA, USA (June 17, 2021).

| SNT plots | GPS                          | Hybrid    | Trait | No. ears sampled | No. ears injured (%) | No. ears containing live larvae (%) | No. live larvae (2 <sup>nd</sup> , 3 <sup>rd</sup> , 4 <sup>th</sup> , 5 <sup>th</sup> , 6 <sup>th</sup> instar) | Ear injury area (cm <sup>2</sup> /injured ear) |
|-----------|------------------------------|-----------|-------|------------------|----------------------|-------------------------------------|------------------------------------------------------------------------------------------------------------------|------------------------------------------------|
| SNT-I     | 31°10'11.7"N<br>92°24'42.6"W | DKC 65-99 | TRE   | 1,663            | 42 (2.5%)            | 35 (2.1%)                           | 46 (17, 26, 3, 0, 0)                                                                                             | 2.3                                            |
| SNT-II    | 31°10'27.9"N<br>92°24'01.2"W | DKC 65-99 | TRE   | 2,442            | 91 (3.7%)            | 85 (3.5%)                           | 89 (28, 53, 8, 0, 0)                                                                                             | 2.2                                            |
| SNT-I     | 31°10'11.7"N<br>92°24'42.6"W | DKC 65-93 | NBt   | 61               | 38 (62.3%)           | 16 (26.2%)                          | 16 (6, 3, 3, 3, 1)                                                                                               | 3.8                                            |

**Table S2.** Establishment of *Helicoverpa zea* lab populations from larvae collected from non-Bt maize and sentinel plots with UXIs.

| Insect population  | Collection date | Location collected | Host plant | No. individuals used to establish lab population | Larval stages collected <sup>‡</sup>            | Generation assayed |
|--------------------|-----------------|--------------------|------------|--------------------------------------------------|-------------------------------------------------|--------------------|
| BZ-SS              | ---             | Lab                | Diet       | ---                                              | ---                                             | ---                |
| NBt <sub>DL</sub>  | June 17, 2021   | Alexandria, LA     | DKC 65-93  | 87 larvae                                        | 3 <sup>rd</sup> - 6 <sup>th</sup> instar larvae | F2                 |
| NBt <sub>SG</sub>  | Aug 18, 2021    | St. Gabriel, LA    | DKC 65-93  | 132 larvae                                       | 3 <sup>rd</sup> - 5 <sup>th</sup> instar larvae | F1                 |
| UXI <sub>LA1</sub> | June 17, 2021   | Alexandria, LA     | DKC 65-99  | 55 pupae                                         | 3 <sup>rd</sup> - 4 <sup>th</sup> instar larvae | F2                 |
| UXI <sub>LA2</sub> | June 17, 2021   | Alexandria, LA     | DKC 65-99  | 63 pupae                                         | 3 <sup>rd</sup> - 4 <sup>th</sup> instar larvae | F2                 |

<sup>‡</sup> 2<sup>nd</sup> instars of UXI<sub>LA1</sub> and UXI<sub>LA2</sub> collected from field continued to be reared on detached ears in the laboratory until 3<sup>rd</sup> to 4<sup>th</sup> instars.

**Table S3.** Occurrence of *Helicoverpa zea* and kernel injury on non-Bt and Bt corn hybrids in two field trials conducted in 2020 (Trial-I and -II).

| Hybrids      | Abb.  | Winnsboro (Trial-II)               |                                    |                                    | Dean Lee (Trial-I)                  |                                    |                                     |
|--------------|-------|------------------------------------|------------------------------------|------------------------------------|-------------------------------------|------------------------------------|-------------------------------------|
|              |       | No larvae/plant                    | Larval development index           | Ear damage                         | No larvae/plant                     | Larval development index           | Ear damage                          |
| DKC 62-05    | NBt3  | 1.46 ± 0.11 bc                     | 4.4 ± 0.4 b                        | 10.5 ± 1.3 d                       | 1.74 ± 0.11 c                       | 4.3 ± 0.4 c                        | 12.3 ± 1.4 d                        |
| DKC 68-24    | NBt4  | 1.75 ± 0.09 c                      | 4.5 ± 0.3 b                        | 12.3 ± 1.0 d                       | 1.56 ± 0.11bc                       | 4.4 ± 0.1 bc                       | 11.8 ± 1.1 d                        |
| NK-NBt       | NKNBt | 1.99 ± 0.19 c                      | 3.1 ± 0.5 a                        | 7.0 ± 0.6 cd                       | n/a                                 | n/a                                | n/a                                 |
| DKC 70-27    | VT2P4 | 1.00 ± 0.20 b                      | 2.4 ± 0.0 a                        | 2.6 ± 0.6 b                        | 1.26 ± 0.12 b                       | 2.9 ± 0.2 a                        | 3.9 ± 0.4 b                         |
| DKC 66-18    | VT2P5 | 1.53 ± 0.32 bc                     | 2.8 ± 0.1 a                        | 4.9 ± 1.0 bc                       | 1.36 ± 0.05 bc                      | 2.9 ± 0.2 a                        | 3.7 ± 0.3 b                         |
| DKC 63-08    | SMT1  | 1.68 ± 0.16 c                      | 3.3 ± 0.2 a                        | 9.1 ± 0.6 d                        | 1.75 ± 0.18 c                       | 3.1 ± 0.1 a                        | 5.7 ± 0.5 c                         |
| DKC 67-42    | SMT2  | 1.40 ± 0.14 bc                     | 2.7 ± 0.2 a                        | 4.2 ± 0.5 bc                       | 1.56 ± 0.11 bc                      | 2.8 ± 0.1 a                        | 3.7 ± 0.3 b                         |
| DKC 65-99    | TRE1  | 0.00 ± 0.00 a                      | n/a                                | 0.0 ± 0.0 a                        | 0.00 ± 0.00 a                       | n/a                                | 0.0 ± 0.0 c                         |
| DKC 67-99    | TRE3  | 0.01 ± 0.01 a                      | 4 *                                | 0.1 ± 0.1 a                        | 0.00 ± 0.00 a                       | n/a                                | 0.0 ± 0.0 c                         |
| NK 1694-3111 | VPT   | 0.00 ± 0.00 a                      | n/a                                | 0.0 ± 0.0 a                        | 0.00 ± 0.00 a                       | n/a                                | 0.0 ± 0.0 c                         |
| ANOVA        |       | $F_{9,25} = 51.62$<br>$P < 0.0001$ | $F_{6,16} = 14.41$<br>$P < 0.0001$ | $F_{9,25} = 91.94$<br>$P < 0.0001$ | $F_{8,24} = 139.53$<br>$P < 0.0001$ | $F_{5,15} = 18.48$<br>$P < 0.0001$ | $F_{8,24} = 260.86$<br>$P < 0.0001$ |

Mean values within a column followed by the same letter are not significantly different (Tukey HSD test,  $\alpha = 0.05$ ).

**Table S4.** Occurrence of *Helicoverpa zea* and kernel injury on non-Bt and Bt corn hybrids in two field trials conducted in 2021 (Trial-III and -IV).

| Hybrids         | Abb.        | Winnsboro (Trial-IV)                 |                                    |                                      | Dean (Trial-III)                    |                                   |                                      |
|-----------------|-------------|--------------------------------------|------------------------------------|--------------------------------------|-------------------------------------|-----------------------------------|--------------------------------------|
|                 |             | No larvae/plant                      | Larval development index           | Ear damage                           | No larvae/plant                     | Larval development index          | Ear damage                           |
| DKC 65-93       | NBt1        | 0.50 ± 0.08 b                        | 4.9 ± 0.2 bc                       | 5.1 ± 0.3 bc                         | 1.39 ± 0.13 bcd                     | 5.7 ± 0.1 ab                      | 13.2 ± 1.2 cd                        |
| DKC 67-70       | NBt2        | 0.65 ± 0.07 b                        | 5.0 ± 0.1 bc                       | 6.1 ± 0.4 cd                         | 1.50 ± 0.17 cd                      | 5.9 ± 0.0 b                       | 15.3 ± 2.1 d                         |
| NKNBT           | NKNBt       | 1.03 ± 0.05 c                        | 5.2 ± 0.1 c                        | 9.2 ± 0.6 d                          | 1.89 ± 0.01 d                       | 5.9 ± 0.0 b                       | 20.0 ± 1.1 d                         |
| DKC 67-72/67-44 | VT2P1/VT2P2 | 1.30 ± 0.15 c                        | 4.4 ± 0.2 ab                       | 6.9 ± 0.4 d                          | 0.88 ± 0.09 bc                      | 4.9 ± 0.4 ab                      | 7.5 ± 1.4 b                          |
| DKC 66-18/65-95 | VT2P5/VT2P3 | 1.19 ± 0.07 c                        | 3.9 ± 0.1 a                        | 4.6 ± 0.5 b                          | 1.04 ± 0.15 b                       | 4.9 ± 0.3 ab                      | 8.4 ± 1.1bc                          |
| DKC 67-42       | SMT2        | 1.08 ± 0.09 c                        | 4.1 ± 0.2 a                        | 5.4 ± 0.4 bcd                        | 0.94 ± 0.16 b                       | 4.5 ± 0.3 a                       | 7.2 ± 1.1 b                          |
| DKC 62-08/65-94 | SMT3/SMT4   | 1.06 ± 0.03 c                        | 4.4 ± 0.1 ab                       | 6.3 ± 0.4 cd                         | 0.88 ± 0.12 b                       | 5.2 ± 0.2 ab                      | 8.3 ± 0.9 bc                         |
| DKC 65-99       | TRE1        | 0.00 ± 0.00 a                        | n/a                                | 0.0 ± 0.0 a                          | 0.01 ± 0.01 a                       | 4*                                | 0.1 ± 0.1 a                          |
| DKC-67-94       | TRE2        | 0.00 ± 0.00 a                        | n/a                                | 0.0 ± 0.0 a                          | 0.00 ± 0.00 a                       | n/a                               | 0.0 ± 0.0 a                          |
| NK 1694-3111    | VPT         | 0.01 ± 0.01 a                        | 4*                                 | 0.0 ± 0.0 a                          | 0.00 ± 0.00 a                       | n/a                               | 0.0 ± 0.0 a                          |
| PI 1622 VYHR    | LEP         | 0.00 ± 0.00 a                        | n/a                                | 0.0 ± 0.0 a                          | 0.00 ± 0.00 a                       | n/a                               | 0.0 ± 0.0 a                          |
| ANOVA           |             | $F_{10,30} = 114.78$<br>$P < 0.0001$ | $F_{6,18} = 12.38$<br>$P < 0.0001$ | $F_{10,30} = 362.64$<br>$P < 0.0001$ | $F_{10,30} = 64.75$<br>$P < 0.0001$ | $F_{6,18} = 3.80$<br>$P = 0.0127$ | $F_{10,30} = 175.91$<br>$P < 0.0001$ |

Mean values within a column followed by the same letter are not significantly different (Tukey HSD test,  $\alpha = 0.05$ ).

**Table S5.** Occurrence of *Helicoverpa zea* and kernel injury on non-Bt and Bt corn hybrids in two field trials conducted in 2022 (Trial-V and -VI).

| Hybrids      | Abb.  | Winnsboro (Trial-VI)                |                                   |                                     | Dean Lee (Trial-V)                   |                                                 |                                      |
|--------------|-------|-------------------------------------|-----------------------------------|-------------------------------------|--------------------------------------|-------------------------------------------------|--------------------------------------|
|              |       | No larvae/plant                     | Larval developmental index        | Ear damage                          | No larvae/plant                      | Larval developmental index                      | Ear damage                           |
| DKC 65-93    | NBt1  | 0.25 ± 0.06 bc                      | 5.6 ± 0.3 a                       | 3.7 ± 0.3 bc                        | 1.54 ± 0.13 b                        | 3.7 ± 0.2 b                                     | 8.0 ± 0.3 cd                         |
| DKC 67-70    | NBt2  | 0.40 ± 0.11 c                       | 4.8 ± 0.9 a                       | 5.3 ± 0.4 d                         | 1.76 ± 0.10 bc                       | 4.8 ± 0.1 c                                     | 14.7 ± 0.8 d                         |
| NKNBT        | NKNBt | 0.44 ± 0.08 c                       | 5.4 ± 0.1 a                       | 4.5 ± 0.5 cd                        | 1.91 ± 0.06 bcd                      | 4.5 ± 0.2 c                                     | 14.4 ± 2.1 d                         |
| DKC 67-72    | VT2P1 | 0.25 ± 0.07 bc                      | 3.9 ± 0.6 a                       | 3.2 ± 0.3 bc                        | 2.51 ± 0.26 d                        | 3.1 ± 0.1 ab                                    | 7.5 ± 1.8 bc                         |
| DKC 65-95    | VT2P3 | 0.33 ± 0.06 c                       | 4.2 ± 0.4 a                       | 3.1 ± 0.2 bc                        | 2.16 ± 0.08 cd                       | 3.0 ± 0.1 a                                     | 3.9 ± 0.7 b                          |
| DKC 67-42    | SMT2  | 0.44 ± 0.02 c                       | 4.4 ± 0.4 a                       | 4.0 ± 0.4 bcd                       | 3.20 ± 0.16 e                        | 3.3 ± 0.1 ab                                    | 9.4 ± 1.0 cd                         |
| DKC 65-94    | SMT4  | 0.20 ± 0.05 abc                     | 4.3 ± 0.4 a                       | 2.8 ± 0.3 b                         | 2.21 ± 0.12 cd                       | 3.2 ± 0.2 ab                                    | 7.0 ± 1.5 bc                         |
| DKC 65-99    | TRE1  | 0.00 ± 0.00 a                       | N/A                               | 0.0 ± 0.0 a                         | 0.03 ± 0.01 a                        | 3.0 ± 0.0 (2 <sup>3rd</sup> )*                  | 0.0 ± 0.0 a                          |
| DKC-67-94    | TRE2  | 0.01 ± 0.01 ab                      | 4*                                | 0.0 ± 0.0 a                         | 0.00 ± 0.00 a                        | n/a                                             | 0.0 ± 0.0 a                          |
| NK 1694-3111 | VPT   | 0.00 ± 0.00 a                       | N/A                               | 0.0 ± 0.0 a                         | 0.01 ± 0.01 a                        | 2.0 (1 <sup>2nd</sup> )*                        | 0.0 ± 0.0 a                          |
| PI 1622 VYHR | LEP   | 0.00 ± 0.00 a                       | N/A                               | 0.0 ± 0.0 a                         | 0.03 ± 0.01 a                        | 3.5 ± 0.5 (3 <sup>rd</sup> , 4 <sup>th</sup> )* | 0.1 ± 0.1 a                          |
| ANOVA        |       | $F_{10,30} = 12.04$<br>$P < 0.0001$ | $F_{6,18} = 1.33$<br>$P = 0.2928$ | $F_{10,30} = 179.8$<br>$P < 0.0001$ | $F_{10,30} = 242.64$<br>$P < 0.0001$ | $F_{6,18} = 21.88$<br>$P = 0.0001$              | $F_{10,30} = 103.86$<br>$P < 0.0001$ |

Mean values within a column followed by the same letter are not significantly different (Tukey HSD test,  $\alpha = 0.05$ ).

**Table S6.** Kernel injury by *Helicoverpa zea* on non-Bt and Bt corn hybrids in three additional field trials conducted in 2022 (Trial-VII, -VIII, and -IX).

| Hybrids      | Abb.  | St. Joseph (Trial-IX)                | Dee Lee (Trial-VII)                 | Winnsboro (Trial-VIII)               |
|--------------|-------|--------------------------------------|-------------------------------------|--------------------------------------|
| DKC 65-93    | NBt1  | 6.4 ± 0.7 bc                         | 10.1 ± 1.4 b                        | 4.3 ± 0.4 bc                         |
| DKC 67-70    | NBt2  | 9.4 ± 0.8 de                         | 16.7 ± 1.5 bc                       | 3.8 ± 0.4 bc                         |
| NKNBT        | NKNBt | 10.4 ± 0.6 e                         | 19.7 ± 1.5 c                        | 4.3 ± 0.1 bc                         |
| DKC 62-05    | NBt3  | 8.0 ± 0.7 bcde                       | 13.8 ± 1.9 bc                       | 4.7 ± 0.7 c                          |
| DKC 63-56    | NBt5  | 8.8 ± 0.7 cde                        | 10.0 ± 0.9 b                        | 5.7 ± 0.8 c                          |
| DKC 66-94    | NBt6  | 6.8 ± 0.5 bcd                        | 11.5 ± 1.0 bc                       | 4.0 ± 0.2 bc                         |
| DKC 70-25    | NBt7  | 9.2 ± 0.7 de                         | 14.3 ± 1.4 bc                       | 3.0 ± 0.5 b                          |
| DKC-67-72    | VT2P1 | 5.9 ± 0.4 b                          | 13.2 ± 0.9 bc                       | 0.3 ± 0.1 a                          |
| DKC 67-94    | TRE2  | 0.0 ± 0.0 a                          | 0.3 ± 0.2 a                         | 0.0 ± 0.0 a                          |
| NK 1694-3111 | VPT   | 0.0 ± 0.0 a                          | 0.7 ± 0.4 a                         | 0.0 ± 0.0 a                          |
| PI 1622 VYHR | LEP   | 0.0 ± 0.0 a                          | 0.1 ± 0.1 a                         | 0.0 ± 0.0 a                          |
| ANOVA        |       | $F_{10,30} = 276.06$<br>$P < 0.0001$ | $F_{10,30} = 91.36$<br>$P < 0.0001$ | $F_{10,30} = 133.73$<br>$P < 0.0001$ |

Mean values within a column followed by the same letter are not significantly different (Tukey HSD test,  $\alpha = 0.05$ ).
